# Supplementary material
Source: PubMed Central journal article supplement (PMC5099119)
Supplement: NIHMS812953-supplement.pdf [file NIHMS812953-supplement.pdf]

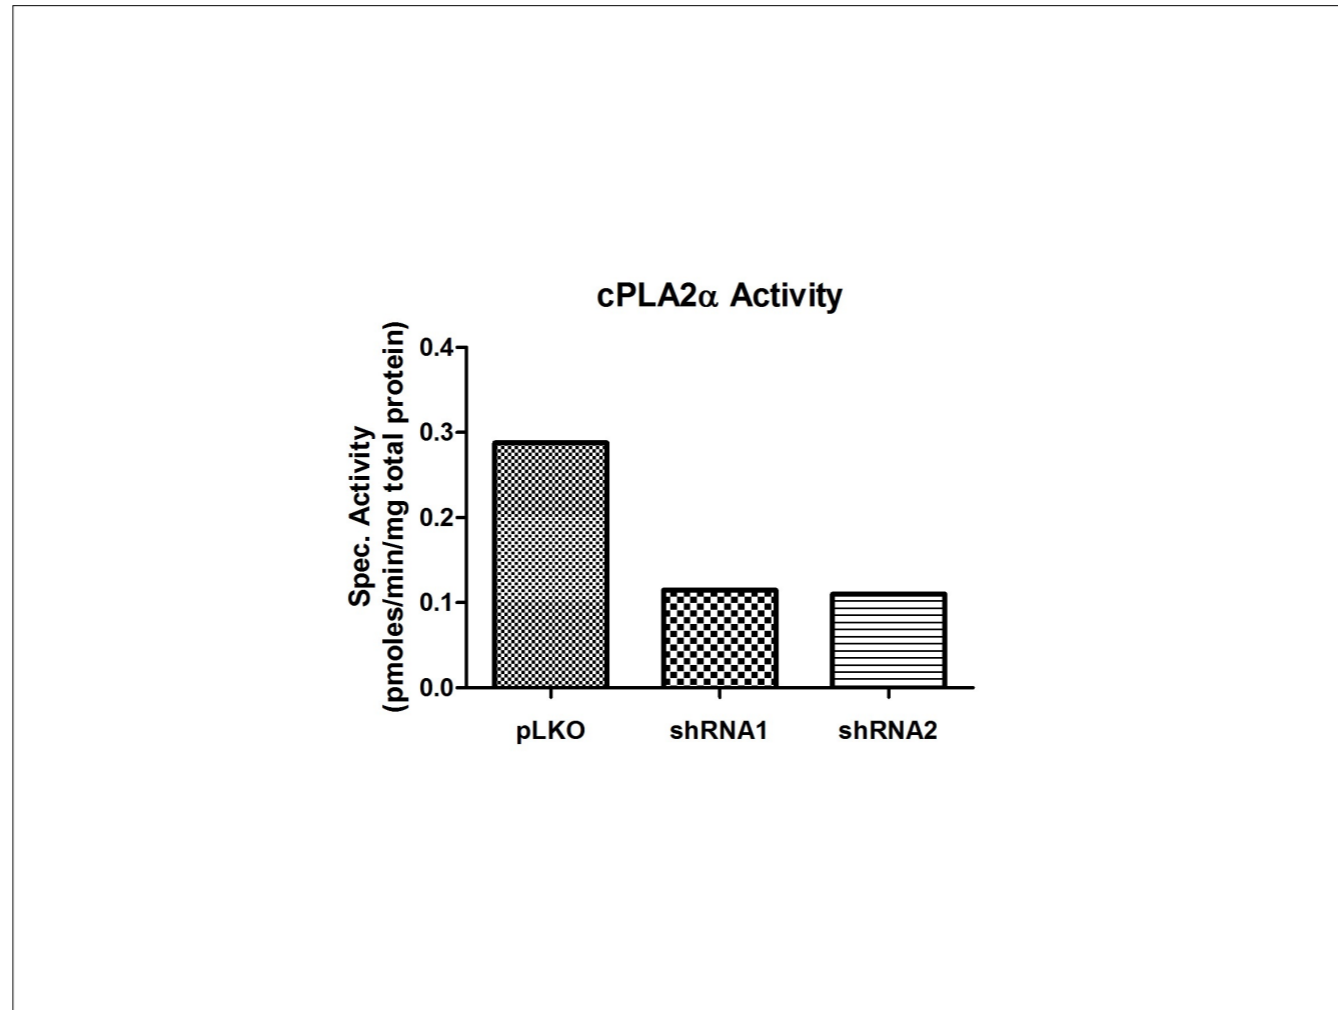

**Supplemental Figure 1. Confirmation of cPLA2 $\alpha$  silencing in HK-2 cells using a cPLA2 $\alpha$  activity assay.** Centrifuged extracts from all three homogenized cell lines were added to substrate ([<sup>14</sup>C] arachidonyl-phosphatidylcholine) with or without calcium. Reactions were analyzed using silica gel thin layer chromatography (LKGD). Lipids were visualized by iodine staining. Under this system, free arachidonic acid migrates near the front (RF 0.8) and is well resolved from diglycerides; unhydrolyzed phospholipid migrates near the origin. Authentic standards were co-chromatographed with the samples. Results were expressed as picomoles of arachidonic acid released per minute per mg of total protein. Further details of this assay have been published before (Gronich, J.H., J.V. Bonventre, and R.A. Nemenoff, Identification and characterization of a hormonally regulated form of phospholipase A2 in rat renal mesangial cells. *J Biol Chem*, 1988. 263(32): p. 16645-16651).

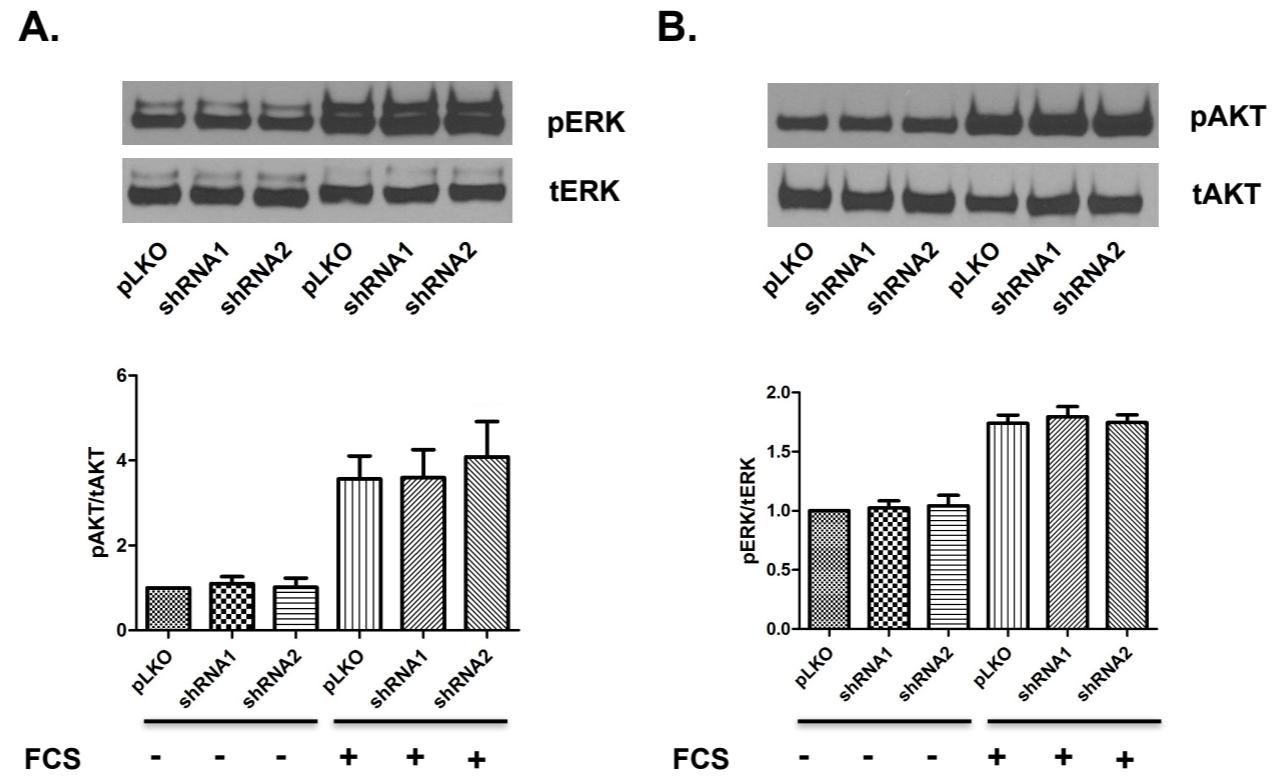

**Supplemental Figure 3. Hypoproliferation induced by cPLA2 silencing is not dependent on ERK and AKT signaling** Cells serum restricted for 24 hours were studied under basal serum free conditions or with stimulation using 10% fetal calf serum for 10 minutes. Western blots and corresponding densitometry for pERK and tERK (A), and pAKT and tAKT (B) are shown. Densitometry figures represent 3 parallel experiments displayed as averages of phospho-/total protein normalized to control cells without serum stimulation. No significant changes in unstimulated or FCS-stimulated levels of protein were appreciated between cell groups.

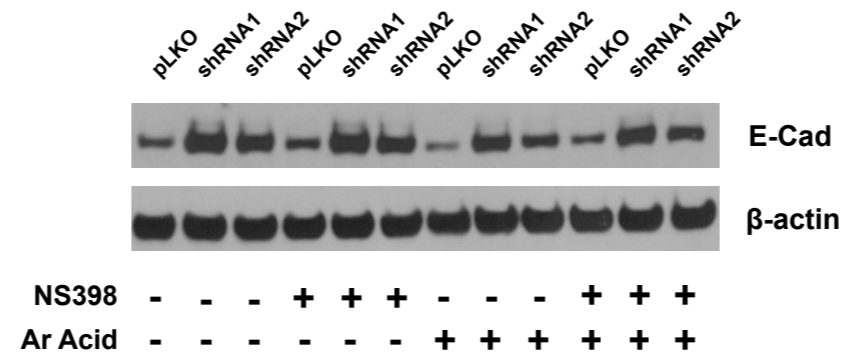

**Supplemental Figure 4. The effects of arachidonic acid on E-cadherin expression are not dependent on COX-2 activity.** Vector (DMSO), a selective COX-2 antagonist (NS398, 10 $\mu$ m), arachidonic acid (5  $\mu$ m), or both were given to all three cell lines and E-cadherin expression was assessed by western blot. NS398 did not change E-cadherin expression and was unable to influence the downregulation in E-cadherin when co-administered with arachidonic acid.
